# Supplementary material for: Assessing the growth in clinical skills using a progress clinical skills examination
Source: PeerJ. 2020 May 1;8:e9091. doi: 10.7717/peerj.9091 (PMC7197398; doi:10.7717/peerj.9091)
Supplement: Supplemental Information 1 [file peerj-08-9091-s001.xlsx]

## Sheet: Study Data
MatricYear	IntSkFS17i	IntSkFS17ii	IntSkSS18i	IntSkSS18ii	HistoryFS17i	HistoryFS17ii	HistorySS18i	HistorySS18ii	PhysExFS17i	PhysExFS17ii	PhysExSS18i	PhysExSS18ii	CounselFS17i	CounselFS17ii	CounselSS18i	CounselSS18ii	SafetyFS17i	SafetyFS17ii	SafetySS18i	SafetySS18ii	PostFS17i	PostFS17ii	PostSS18i	PostSS18ii
2016	86	83	94	97	65	84	63	60	30	46	39	35	38	39	57	59	87	43	78	94	69	50	66	57
2017	97	94	94	100	35	77	56	58	36	47	51	55	54	78	47	59	75	49	78	88	45	31	62	48
2016	97	92	94	84	81	79	94	66	61	78	53	74	80	77	61	72	87	49	88	91	64	54	71	58
2016	94	90	94	91	66	77	72	81	47	70	69	79	65	76	83	66	73	51	81	88	51	40	64	54
2016	97	96	100	88	74	89	84	75	66	73	74	50	70	90	81	66	92	52	81	94	68	63	76	68
2016	100	86	97	88	65	76	74	63	52	67	59	73	81	81	67	75	87	42	84	88	49	48	68	57
2017	79	85	97	94	21	46	74	70	11	20	39	50	48	49	70	59	71	48	84	88	32	29	56	48
2016	97	93	84	97	61	67	73	68	55	53	57	56	80	71	81	63	92	55	63	94	44	47	65	56
2016	89	88	94	97	53	80	85	61	56	69	51	54	72	70	70	59	80	52	88	88	56	60	68	54
2016	79	94	94	97	69	74	73	66	73	74	60	69	73	72	58	72	92	61	88	91	69	53	76	68
2017	75	83	100	91	25	52	69	56	24	27	47	64	63	74	73	63	57	39	84	88	41	31	70	53
2017	88	91	97	91	29	62	80	54	19	37	45	46	50	48	60	66	87	42	88	84	31	26	54	42
2016	83	93	84	91	57	81	71	70	48	54	46	61	86	70	69	41	85	52	81	88	41	35	60	41
2016	81	100	94	100	76	80	80	63	74	75	78	71	74	72	80	75	87	52	75	88	65	52	68	67
2016	100	98	97	91	72	77	81	70	68	54	60	76	80	78	57	75	80	65	88	88	59	42	61	51
2017	100	88	94	94	46	70	73	63	20	37	36	45	57	48	58	66	80	43	72	91	33	28	59	50
2017	84	83	84	91	24	67	60	61	21	36	41	56	71	61	62	81	76	49	81	88	48	31	56	51
2017	79	74	97	94	25	48	57	63	26	22	43	50	56	70	60	59	57	35	66	88	27	33	59	57
2016	92	88	97	84	80	78	78	71	55	60	61	40	81	82	67	66	88	48	78	97	59	58	78	54
2016	98	94	94	94	43	67	79	66	41	59	54	54	71	66	67	66	87	69	69	81	58	47	71	51
2016	92	90	75	88	45	85	69	55	37	64	44	59	87	74	68	59	85	57	81	69	58	38	68	54
2017	100	78	97	94	44	57	66	74	26	38	36	39	62	65	61	56	77	53	75	91	56	36	59	56
2016	97	93	88	88	77	83	76	68	51	72	63	64	88	79	63	63	92	58	78	94	59	64	74	61
2017	92	74	94	91	47	57	74	74	35	48	60	60	88	80	73	63	83	42	81	84	38	29	55	50
2016	100	98	97	97	46	67	65	78	44	61	66	48	79	76	55	66	87	58	66	94	66	45	64	49
2016	89	90	91	100	59	73	60	85	58	62	46	61	77	52	55	56	76	41	75	84	55	51	69	53
2016	81	85	94	91	61	69	68	63	61	59	56	53	76	78	76	69	82	55	75	75	51	37	67	53
2017	86	74	94	94	23	60	64	50	21	36	33	44	64	50	48	56	65	48	63	72	41	29	63	46
2016	83	85	78	88	60	77	58	75	41	67	51	68	74	69	66	56	80	55	72	84	44	38	47	45
2017	97	80	97	94	30	44	76	68	29	46	57	75	65	69	88	59	68	51	81	78	35	29	52	60
2016	72	83	94	94	60	82	72	65	42	50	40	43	56	67	82	63	92	53	59	91	58	48	62	51
2016	88	98	94	91	66	77	74	70	47	52	62	53	68	72	68	66	73	58	88	75	54	45	66	35
2016	98	89	94	91	62	68	78	69	47	51	52	60	71	69	76	78	87	55	81	78	58	63	63	57
2016	98	100	97	100	58	79	70	63	41	44	61	49	77	81	75	69	87	65	88	88	50	43	63	55
2017	90	94	94	100	41	75	72	76	32	69	57	59	64	78	76	63	76	55	78	84	37	23	57	41
2017	97	81	94	94	32	30	74	65	10	39	30	46	51	56	52	59	58	48	56	81	31	25	57	39
2017	75	86	91	91	22	69	82	69	16	46	25	51	66	53	61	72	69	42	81	91	44	43	57	46
2017	94	78	94	97	34	57	60	69	20	34	22	44	47	19	40	56	58	39	66	84	23	26	57	47
2017	89	100	94	94	50	53	84	65	26	56	46	40	63	74	63	69	61	58	78	75	42	36	54	51
2016	90	89	88	100	60	66	65	65	40	44	40	54	88	82	51	63	92	56	75	84	54	39	74	49
2016	83	86	97	100	74	77	81	70	65	61	60	71	88	74	68	69	92	58	81	94	52	37	65	49
2016	100	97	97	97	67	74	82	65	64	50	76	69	74	88	82	63	79	52	75	88	54	44	61	51
2017	100	82	84	88	40	55	68	60	27	33	25	58	50	59	52	56	68	51	78	75	44	42	72	53
2016	97	84	91	97	84	72	81	81	65	80	74	56	63	66	69	53	87	46	94	88	61	68	81	64
2017	90	89	78	97	51	58	74	61	13	4	8	31	64	72	51	44	82	42	72	88	36	36	57	49
2017	96	95	94	97	27	62	78	68	14	32	17	36	51	48	73	53	79	42	56	78	34	24	46	40
2017	63	82	91	94	46	56	70	61	26	37	47	46	61	66	77	56	68	45	81	84	26	31	54	54
2017	92	96	88	94	47	66	70	74	36	47	49	61	67	56	59	69	73	48	75	88	51	39	59	45
2016	89	83	94	88	50	82	74	73	56	72	47	73	68	81	74	69	85	52	81	81	44	42	64	56
2016	94	66	84	84	33	67	76	69	36	56	55	59	30	49	53	44	76	42	63	88	53	43	48	42
2017	89	75	88	91	32	52	76	70	14	23	37	53	59	50	54	31	69	39	81	84	35	35	64	48
2016	94	91	88	88	50	63	69	63	43	53	59	36	77	83	72	63	73	58	75	78	51	36	62	49
2016	90	98	91	94	66	69	81	64	56	63	54	56	67	62	74	66	92	55	78	91	54	50	69	58
2017	97	91	94	88	36	74	67	71	34	32	55	53	63	55	50	56	77	49	63	69	38	29	51	44
2016	100	94	94	88	63	74	72	78	43	61	68	73	82	76	63	72	80	65	91	78	49	43	67	48
2016	92	86	97	91	71	74	84	73	41	72	64	71	64	72	81	59	87	58	69	91	59	37	66	56
2016	87	86	94	91	43	74	80	80	50	69	75	64	81	71	70	72	96	48	81	91	61	60	73	56
2016	92	95	97	100	67	77	70	73	50	67	46	54	74	55	66	66	87	46	75	88	71	58	77	56
2017	83	69	75	84	11	56	54	64	12	14	29	56	61	56	63	53	69	42	69	94	30	25	54	41
2016	99	91	97	94	79	75	59	78	56	68	78	68	71	76	72	72	87	65	94	78	51	56	68	54
2017	69	84	88	91	30	57	51	59	21	52	50	45	57	64	62	66	68	51	56	91	34	33	61	39
2016	93	86	91	91	77	77	69	58	61	56	69	41	50	52	66	66	83	55	72	84	69	40	63	56
2016	79	93	91	97	59	69	72	63	65	70	70	64	80	76	63	69	77	58	53	88	50	36	67	56
2016	89	92	91	91	37	74	69	71	46	48	62	40	30	67	36	72	71	50	88	94	56	50	61	56
2017	95	95	91	88	30	59	67	61	29	28	45	50	87	81	66	63	83	45	81	91	46	36	60	54
2016	100	94	97	100	66	83	80	60	64	63	71	65	70	71	73	50	80	52	72	88	61	55	74	58
2016	97	100	91	94	52	88	79	73	50	66	73	68	84	82	63	72	92	65	88	91	63	44	63	56
2016	98	97	97	94	73	77	92	74	45	66	56	68	88	82	55	84	77	61	88	94	46	51	69	66
2016	100	100	94	100	71	82	76	73	45	49	40	60	82	69	75	63	92	65	84	91	54	45	65	58
2017	88	84	94	97	15	53	82	70	15	29	24	38	44	59	83	63	64	49	72	88	34	18	46	43
2017	90	81	88	84	34	65	80	69	18	46	66	59	53	73	75	78	73	60	75	84	35	29	63	53
2017	97	85	91	97	46	65	70	69	28	33	54	69	53	34	66	66	68	60	84	88	50	36	58	56
2017	93	77	97	94	34	52	59	63	26	45	43	50	64	72	67	53	69	46	69	81	51	29	63	50
2016	100	92	91	97	74	77	87	55	43	65	52	51	72	79	65	72	92	49	81	88	56	56	72	54
2017	72	85	94	97	31	57	77	65	25	54	40	56	45	71	77	75	75	69	78	81	42	24	56	43
2016	81	93	97	84	68	74	73	56	60	71	59	54	76	80	70	66	92	65	59	88	61	52	68	61
2017	95	92	91	91	42	48	59	65	23	20	28	44	61	65	59	78	61	38	69	72	26	17	49	39
2017	81	79	94	94	31	36	76	65	32	25	49	46	71	54	69	56	80	43	84	81	31	28	56	40
2016	94	93	91	88	61	75	77	68	66	81	74	73	74	73	69	56	87	58	94	91	62	54	76	70
2016	97	92	81	91	71	75	85	63	51	80	59	69	83	77	76	56	87	58	63	75	62	43	61	53
2017	95	92	94	97	22	57	67	55	32	48	43	59	87	69	57	75	54	42	63	91	49	34	68	51
2017	96	97	94	97	47	75	76	51	45	42	35	44	61	71	71	84	80	55	75	88	40	24	46	41
2017	67	77	84	94	13	51	81	76	28	31	52	61	27	77	70	59	80	49	72	81	35	28	64	52
2016	97	92	91	88	77	69	79	73	49	61	55	45	63	53	63	53	92	55	78	78	56	48	68	58
2017	97	90	94	88	47	72	65	65	25	42	39	53	69	62	74	75	85	36	66	81	26	24	42	39
2016	96	93	94	94	69	80	69	83	57	56	56	63	72	75	63	66	92	61	94	78	54	42	74	52
2017	92	69	94	88	23	51	59	55	32	52	57	66	64	52	79	56	76	61	75	94	29	26	41	38
2016	92	86	97	94	67	77	71	75	50	66	68	60	69	75	53	66	87	52	94	91	66	56	73	43
2016	100	92	91	97	69	66	66	75	64	62	72	58	88	73	58	59	87	58	88	84	63	47	72	58
2017	81	84	88	88	18	43	53	73	29	48	27	48	67	53	52	47	80	42	63	81	41	30	54	55
2017	79	92	91	94	19	65	61	68	36	30	34	54	51	76	60	47	64	46	66	75	21	36	51	34
2016	95	93	81	88	47	78	64	64	54	58	49	60	82	80	71	50	92	52	66	81	56	44	65	52
2017	96	89	84	100	52	76	73	66	11	52	35	39	64	85	60	69	87	52	81	88	36	23	62	40
2017	96	78	94	88	50	62	75	65	33	51	33	59	76	58	55	66	76	42	75	81	46	32	56	44
2017	67	83	94	97	16	56	73	60	24	35	33	38	62	64	77	75	83	42	63	100	45	30	50	49
2017	81	90	94	100	30	62	70	75	27	47	45	56	50	81	88	56	58	42	75	84	36	28	55	39
2017	75	95	97	88	15	58	71	60	14	36	29	43	51	63	67	66	55	49	75	91	35	24	49	47
2017	79	81	97	97	15	46	68	74	25	11	41	49	58	57	67	50	80	48	63	78	32	28	44	34
2016	97	91	91	88	52	75	66	70	51	57	55	68	72	74	69	72	92	43	88	84	51	40	73	48
2017	85	74	88	91	26	45	63	58	31	53	34	50	42	76	66	63	54	39	50	75	32	32	59	37
2017	92	79	78	88	20	59	71	60	18	14	35	50	34	52	52	47	80	44	72	75	29	29	51	43
2017	97	80	81	88	23	43	57	63	9	32	31	63	44	74	47	53	64	35	66	88	36	31	61	49
2017	87	90	88	88	30	63	69	63	15	37	36	50	57	66	60	66	69	45	63	78	17	23	46	36
2016	100	95	91	91	62	79	76	78	49	75	64	65	77	88	75	81	92	65	81	97	52	57	71	52
2017	97	81	94	97	27	53	73	74	22	54	45	56	59	50	48	41	81	48	63	63	32	31	57	48
2017	83	90	91	81	32	75	62	68	26	34	37	36	42	42	46	53	65	42	63	78	36	36	62	44
2016	95	94	94	91	56	67	71	71	41	59	39	46	62	69	79	59	90	50	53	75	68	51	62	68
2017	82	84	78	97	14	28	74	71	27	39	31	51	40	65	48	66	61	29	84	100	37	23	41	33
2017	89	97	97	94	34	62	58	76	18	42	34	49	53	63	49	69	80	71	59	94	48	36	64	48
2016	89	98	91	97	53	71	86	73	41	63	55	55	68	78	70	63	87	63	69	81	61	58	66	59
2016	89	84	91	91	54	67	80	83	49	47	51	69	87	77	78	59	92	53	88	78	58	56	74	61
2017	61	75	81	91	25	65	66	55	21	36	31	50	32	63	56	59	58	48	56	84	33	28	59	50
2016	88	90	94	100	72	88	83	75	55	71	42	66	72	72	78	66	87	52	72	81	46	44	63	51
2017	74	88	88	97	28	67	56	71	41	49	59	69	73	75	74	81	92	52	63	84	39	40	62	57
2017	96	88	94	97	30	48	70	74	14	31	36	44	62	62	62	66	61	36	69	84	37	24	49	33
2016	98	89	91	94	55	82	88	68	56	68	69	59	77	76	83	63	87	52	88	97	65	63	71	63
2016	93	95	97	94	68	82	81	60	67	55	56	74	77	78	68	59	87	58	75	94	67	54	76	58
2017	79	82	97	91	26	53	56	60	13	41	34	40	44	60	50	63	80	45	56	88	37	29	47	48
2017	89	72	91	88	32	64	77	55	23	22	29	48	55	40	63	47	80	49	66	78	32	16	53	39
2017	71	67	97	97	24	45	63	64	15	31	42	50	47	60	67	59	80	43	88	91	31	24	57	51
2016	100	92	91	97	72	82	78	65	46	57	67	58	88	71	77	69	92	49	66	81	65	59	77	53
2016	77	78	88	91	65	82	67	75	59	62	61	60	66	68	52	69	87	55	88	94	49	33	51	39
2017	99	83	94	94	25	60	69	69	18	43	47	68	63	64	70	66	50	51	69	84	34	34	63	50
2016	91	93	91	91	38	70	88	71	69	63	62	73	72	70	64	63	92	55	81	81	63	35	53	48
2016	75	88	97	88	57	69	94	73	42	43	62	54	78	53	69	63	87	55	78	97	47	55	71	55
2016	91	94	91	94	60	67	56	69	57	63	52	54	70	75	63	47	87	52	81	75	46	40	59	54
2017	72	80	94	84	12	47	83	61	27	38	32	44	55	58	83	53	73	48	75	88	34	29	54	48
2017	97	100	91	100	41	62	88	79	35	39	50	50	62	72	92	69	87	58	72	91	47	34	71	58
2016	81	96	94	84	60	80	82	75	63	50	58	59	74	74	69	53	87	61	75	88	62	50	73	51
2017	83	86	81	100	14	38	60	73	30	26	34	48	56	40	39	56	57	45	63	84	29	26	48	47
2017	96	89	91	91	15	43	70	66	17	22	27	56	48	58	71	50	64	49	69	84	28	15	48	39
2016	86	85	88	97	63	62	67	69	39	53	43	55	71	71	71	59	87	52	84	84	51	44	67	48
2017	72	80	88	94	17	59	68	63	24	36	42	60	66	66	75	78	80	45	75	81	32	29	51	49
2017	89	93	88	94	39	48	60	73	25	24	35	51	50	67	48	72	83	35	72	88	36	28	52	38
2017	64	85	100	91	26	65	79	75	22	42	19	49	56	59	66	53	73	53	75	81	46	31	54	47
2016	88	88	97	100	69	67	86	64	53	71	77	75	75	69	62	81	73	49	84	88	69	49	73	59
2017	70	86	91	94	24	60	68	70	25	16	37	58	41	66	80	59	80	36	72	88	32	28	57	51
2017	92	85	97	91	57	66	79	63	36	40	48	58	65	50	55	69	80	42	66	84	54	28	44	42
2017	92	89	88	94	27	50	70	71	31	48	47	61	74	72	73	59	69	46	69	81	32	29	68	44
2016	100	91	94	91	70	77	84	61	46	62	62	66	90	78	72	75	92	52	94	88	66	63	70	57
2017	92	85	91	94	34	60	54	49	26	38	29	70	50	68	70	63	64	60	66	88	26	24	44	44
2016	87	82	94	97	54	84	62	63	50	54	46	65	79	68	64	69	87	58	75	91	57	44	66	58
2017	41	84	88	88	17	51	71	63	35	44	40	44	68	77	74	66	77	46	75	81	33	21	60	45
2017	89	76	94	91	28	32	59	54	27	11	40	46	58	51	61	50	65	35	56	81	44	23	61	41
2017	85	89	94	97	25	58	69	65	20	48	49	56	69	65	68	69	68	44	66	78	30	28	57	35
2016	97	100	94	94	76	70	69	76	50	51	53	63	70	77	81	75	92	58	88	94	49	59	67	57
2017	88	86	100	97	22	47	81	79	19	33	38	55	45	63	64	72	61	54	69	84	36	26	55	51
2016	100	89	91	94	56	79	82	64	71	52	64	64	80	69	75	72	87	57	81	81	56	55	63	59
2016	96	96	88	91	77	75	73	74	54	72	50	61	80	74	70	66	88	63	72	91	71	62	73	66
2017	92	71	100	94	29	39	65	50	37	40	39	49	75	56	68	63	73	42	75	84	29	27	47	40
2016	97	82	84	88	34	65	64	55	35	50	50	36	47	50	56	50	80	52	53	56	39	26	52	38
2016	92	88	94	94	63	65	76	64	57	59	57	51	85	82	76	69	77	58	81	84	55	34	69	45
2016	92	97	94	91	73	82	72	69	63	57	54	64	71	70	60	72	83	58	66	81	57	44	61	54
2016	81	85	100	100	52	76	73	70	46	46	60	60	57	70	66	69	85	49	69	100	49	28	59	53
2017	96	100	97	97	24	53	64	48	12	33	49	49	61	48	59	53	57	39	81	94	46	31	64	46
2016	100	85	97	97	65	82	78	78	48	68	65	54	76	86	76	59	80	55	88	81	59	52	71	61
2017	82	80	94	91	28	42	68	64	22	38	42	43	74	72	49	59	50	51	75	97	44	33	59	46
2017	93	77	88	81	29	57	73	49	30	50	53	35	55	56	71	59	68	46	88	69	32	25	52	35
2017	92	90	88	84	35	67	70	78	15	39	37	46	63	67	60	66	76	43	81	72	46	32	56	50
2016	98	89	84	91	71	75	73	65	59	70	76	63	76	65	66	56	80	61	69	88	53	36	63	57
2016	86	90	94	97	68	68	74	68	48	68	53	58	72	66	56	63	87	52	81	81	59	51	76	56
2017	71	83	88	100	34	57	67	59	18	22	35	41	53	38	46	44	77	40	75	75	32	23	60	54
2016	70	95	94	97	59	75	80	68	62	73	65	64	77	68	68	72	87	61	88	91	51	40	68	51
2016	93	100	91	97	51	80	76	74	41	58	69	61	49	66	65	63	80	52	88	88	43	44	63	44
2016	82	94	97	100	37	62	60	74	59	59	66	74	70	71	66	56	92	52	75	88	68	53	77	64
2016	100	92	84	88	69	73	80	80	59	61	72	74	84	83	86	72	92	52	81	84	54	43	68	55
2016	96	93	91	97	75	79	69	70	49	72	66	54	80	75	60	66	87	58	75	81	56	46	70	58
2016	75	96	88	100	61	82	70	79	54	70	42	74	63	61	69	63	92	63	69	78	52	47	68	60
2017	94	78	94	97	65	63	62	65	33	50	42	51	67	55	61	66	82	45	88	94	44	36	43	49
2017	99	94	97	97	30	58	72	56	13	29	32	58	59	70	64	63	73	52	59	88	24	23	42	38
2017	68	76	94	91	17	37	68	53	22	41	41	51	67	75	68	50	68	35	75	81	32	32	49	41
2016	83	85	94	94	67	79	76	78	44	62	49	51	62	56	65	66	76	65	84	91	62	49	73	61
2016	98	97	97	94	61	85	62	64	32	51	37	51	55	57	65	50	87	61	78	81	63	42	57	53
2016	93	98	88	81	59	73	61	78	37	39	35	51	70	71	48	56	76	65	69	94	54	44	66	47
2017	96	92	94	91	19	59	66	71	20	38	46	48	59	49	23	47	76	36	88	78	29	32	63	43
2017	76	84	69	94	15	55	68	56	24	48	44	69	43	57	59	50	73	35	69	84	38	27	49	43
2016	93	84	94	91	59	71	68	74	38	72	70	58	77	76	70	56	92	58	75	84	59	50	63	61
2017	91	86	78	97	36	50	66	69	24	48	40	73	51	51	32	72	65	51	75	84	33	28	44	46
2016	90	89	97	91	61	77	68	80	62	53	62	69	70	70	73	72	92	63	69	91	55	38	64	49
2016	94	92	88	88	74	79	85	70	39	65	59	59	81	80	73	66	87	49	81	94	57	44	74	58
2016	96	93	97	91	67	80	76	83	33	58	66	69	84	82	75	72	87	58	94	88	69	47	73	59
2017	96	85	94	94	46	64	56	58	21	39	50	56	71	77	58	59	68	63	66	88	41	37	61	49
2016	72	95	94	94	65	72	65	69	48	58	49	58	40	58	63	59	82	58	69	84	43	36	57	57
2017	100	88	88	100	54	68	75	66	34	50	41	68	57	61	57	66	80	52	81	88	39	31	56	48
2016	98	80	84	88	58	70	69	68	43	58	56	56	63	46	73	59	82	52	66	84	53	41	65	43
2016	87	91	100	91	79	82	76	80	52	78	65	54	76	53	76	84	87	71	75	94	63	52	81	54
2016	89	91	91	91	77	70	68	58	47	56	48	59	74	67	57	50	92	58	69	88	59	63	73	56
2017	85	83	97	91	20	67	66	71	26	49	42	58	68	64	79	66	76	61	88	88	47	32	54	56
2017	72	83	91	91	48	49	53	56	34	53	41	66	67	66	69	56	74	47	63	78	36	30	52	46
2016	89	93	81	100	66	73	56	75	48	57	60	69	56	72	70	63	87	46	69	78	59	40	72	56
2017	83	81	84	88	13	43	60	35	9	33	19	21	27	46	70	59	64	42	81	81	19	22	43	35
2017	97	90	100	91	18	61	74	80	31	39	51	60	56	65	69	66	80	46	84	91	34	33	61	54
2016	81	92	97	94	72	79	69	71	62	71	72	75	75	81	60	72	80	58	88	91	52	40	55	53
2016	83	82	88	84	59	76	72	73	66	52	68	75	80	72	53	47	92	63	84	75	69	54	72	44
2016	100	95	88	88	61	71	60	76	67	68	53	71	78	75	66	75	85	58	75	75	66	56	72	59
2016	89	90	84	97	62	73	76	70	74	64	53	64	91	68	65	47	95	68	81	91	51	38	76	54
2017	89	94	100	94	18	62	67	56	19	28	15	61	51	74	66	59	71	39	66	75	24	23	55	43
2017	89	89	91	91	25	54	78	70	25	50	33	59	47	66	72	56	75	59	75	84	51	41	66	58
2017	89	81	91	97	36	64	71	66	28	46	35	50	46	67	55	47	69	46	69	84	43	27	51	39
2016	98	98	91	91	69	75	82	80	43	64	61	54	85	79	68	72	92	58	81	81	56	43	67	49
2016	97	95	97	94	76	69	71	64	49	62	51	60	70	77	66	66	92	58	88	78	53	42	59	56
2016	96	92	94	94	49	73	69	81	56	61	55	74	57	58	48	66	88	40	84	94	61	40	64	56
2016	83	92	84	94	69	75	88	73	65	68	64	73	80	70	83	78	92	41	81	94	59	49	76	69
2016	100	85	94	100	79	82	84	71	62	74	62	63	80	66	81	59	96	65	88	84	59	40	69	46
2017	87	85	94	91	40	50	69	71	33	49	45	58	64	68	74	69	83	46	81	81	27	31	45	51
2017	89	85	91	97	33	58	69	59	40	45	41	58	51	44	54	63	80	41	75	75	44	28	47	47
2017	60	80	81	81	16	35	52	55	14	13	14	14	51	72	70	50	64	40	88	81	34	19	44	34
2017	77	72	84	91	25	38	55	73	30	46	27	43	40	57	61	59	83	45	78	88	46	21	53	34
2017	87	78	88	94	26	60	54	64	19	29	23	58	56	53	23	72	64	50	44	84	44	31	64	52
2016	94	92	97	94	73	87	76	75	61	67	66	66	83	81	78	78	83	49	81	88	54	43	71	54
2016	94	94	97	81	60	74	73	75	61	53	68	61	66	70	80	53	80	42	81	84	47	36	62	51
2016	83	86	94	100	80	75	80	80	55	50	53	55	70	78	79	66	92	50	69	88	70	43	79	59
2016	100	94	94	97	73	73	73	63	50	69	65	63	82	82	70	75	87	58	94	94	63	45	68	49
2016	86	92	91	97	54	79	67	76	41	49	49	63	62	64	66	44	87	46	81	88	60	52	68	51
2016	100	92	93	94	55	71	85	69	54	54	53	53	85	78	80	78	87	65	82	84	57	50	71	49
2016	97	89	78	84	47	69	61	71	47	54	61	59	82	72	81	38	92	52	75	72	50	42	61	60
2016	75	81	94	88	58	75	77	73	59	55	70	48	77	54	69	69	77	43	84	94	50	48	69	59
2016	100	88	94	91	85	77	76	75	43	61	55	58	90	78	68	56	88	52	88	81	61	58	70	62
2017	85	90	94	97	32	83	70	75	21	46	56	56	46	78	50	59	79	40	72	91	25	24	51	54
2017	87	71	81	94	23	56	62	59	12	58	41	53	54	48	61	56	50	51	59	91	47	30	57	50
2016	96	93	94	97	66	70	74	64	59	51	51	59	71	74	71	75	92	58	75	78	59	45	73	50
2017	98	93	91	100	24	68	78	71	17	43	51	60	52	71	67	53	73	46	78	78	31	42	59	49
2017	76	76	81	97	33	55	63	66	35	40	57	43	44	58	53	56	75	68	72	75	31	33	59	49
2017	88	89	94	100	25	54	74	65	23	37	36	54	53	50	53	44	83	55	81	81	37	36	68	53
2017	98	94	94	88	43	64	86	45	36	55	43	49	62	58	57	84	75	48	78	78	43	38	72	51
2016	100	100	97	91	79	71	71	70	62	73	52	71	87	64	55	75	92	71	84	84	54	55	78	59
2017	89	86	88	88	32	45	62	58	35	36	25	48	69	51	62	53	77	48	63	88	47	27	61	45
2017	93	94	88	88	32	35	56	58	21	38	41	53	50	69	75	63	75	42	59	78	35	36	59	51
2017	92	93	91	94	31	62	57	69	24	48	50	53	71	59	47	81	74	35	59	88	44	22	52	50
2017	68	96	91	88	30	47	51	58	22	48	40	40	57	53	60	41	61	17	63	72	19	29	49	28
2017	89	89	88	78	42	63	68	53	27	32	39	65	59	51	47	50	76	39	59	81	38	25	59	43
2017	71	85	88	78	6	53	63	51	14	18	32	48	40	77	39	53	75	39	66	78	38	27	51	41
2017	65	78	91	97	26	52	57	60	37	45	37	43	65	73	66	72	85	65	63	88	37	33	57	44
2017	80	93	97	88	36	58	80	68	24	67	49	56	41	67	57	66	87	65	91	91	44	40	58	56
2017	80	85	91	88	48	55	59	68	29	45	56	41	46	53	74	63	87	45	63	81	50	37	59	48
2016	100	94	94	94	73	69	76	79	36	55	61	50	81	76	58	56	92	58	66	84	53	50	72	54
2017	74	76	84	88	31	34	63	50	33	18	31	26	68	59	34	53	67	29	66	78	38	32	57	48
2017	93	80	91	91	24	49	68	64	38	54	64	65	74	52	54	59	76	42	69	72	36	33	68	48
2017	69	89	81	81	34	66	56	63	27	37	43	58	51	72	58	66	67	46	75	81	38	20	53	43
2017	78	89	94	94	36	55	70	60	37	50	50	48	64	65	85	66	87	46	63	84	46	26	73	66
2017	89	95	94	100	57	60	82	68	47	58	66	80	56	64	75	56	75	42	72	88	44	30	59	61
2016	97	89	91	88	74	78	71	56	34	58	62	56	82	71	70	69	87	55	75	81	64	39	72	58
2017	79	90	100	91	56	63	75	68	32	36	40	59	75	83	63	50	87	50	91	97	38	29	47	44
2017	79	67	84	84	28	32	76	63	22	22	35	58	54	59	79	72	75	42	75	75	53	37	61	56
2016	89	91	91	97	65	76	89	64	52	71	61	81	62	62	76	75	87	55	88	94	71	56	79	73
2016	92	89	88	88	59	71	86	73	47	73	57	55	82	86	75	75	73	52	78	75	64	53	72	57
2016	88	89	94	94	76	74	72	64	55	64	60	64	87	78	59	75	92	58	94	81	56	46	73	49
2016	98	100	91	97	72	80	71	83	49	60	71	58	77	76	68	63	92	58	81	94	59	54	66	62
2017	98	97	84	94	56	67	65	65	37	47	37	31	63	67	68	66	80	39	69	75	34	24	51	40
2017	96	88	97	94	52	52	80	58	15	29	25	38	70	72	68	81	83	51	81	78	54	27	57	50
2017	66	85	91	97	38	52	77	76	12	33	45	36	49	56	65	50	69	49	81	84	33	20	52	39
2017	93	85	100	94	41	54	77	63	26	35	38	68	71	52	44	69	92	43	69	94	39	25	66	49
2017	92	89	97	91	44	49	77	80	18	33	55	56	37	52	69	50	79	48	81	84	26	33	51	38
2016	83	92	97	91	79	76	73	70	72	72	74	74	83	73	79	63	92	47	84	88	81	66	84	62
2017	92	84	100	97	43	62	66	61	45	53	48	60	73	71	62	53	62	35	66	75	48	31	57	41
2017	87	74	84	88	21	49	70	49	29	37	44	41	52	73	70	41	68	35	72	84	44	33	48	45
2016	92	90	84	91	68	70	64	78	72	68	62	53	82	76	70	69	92	38	69	84	58	52	81	58
2016	89	95	94	94	51	69	78	68	56	54	58	48	80	80	65	69	85	56	75	84	59	42	71	61
2016	83	97	94	94	68	71	72	75	64	59	64	73	71	65	77	66	76	59	69	91	61	43	79	59
2017	77	79	94	91	29	45	66	65	17	22	35	44	57	66	55	53	81	54	59	75	29	21	36	31
2016	97	98	94	100	54	80	76	73	66	79	58	74	55	75	68	59	95	65	81	78	67	47	74	76
2016	77	85	84	88	60	68	72	63	38	44	51	53	77	75	75	50	92	46	88	84	53	44	63	59
2016	74	68	81	78	48	73	58	64	25	46	53	43	62	58	63	50	87	46	84	78	49	37	70	53
2016	89	91	91	97	76	69	87	80	42	59	63	60	73	84	80	66	96	58	81	84	65	52	71	55
2016	100	89	91	94	55	80	65	70	48	65	57	65	71	73	63	63	76	49	69	81	61	37	64	52
2017	89	81	88	94	17	48	56	61	18	38	28	68	50	57	51	66	70	39	69	97	37	30	56	45
2016	100	94	91	94	69	79	78	75	52	67	64	68	74	79	71	59	87	52	78	88	58	53	65	59
2017	87	81	100	94	28	39	70	63	18	52	37	40	61	52	62	69	80	46	66	78	41	28	56	50
2016	97	100	94	94	68	76	77	76	64	59	51	66	65	74	77	56	92	54	69	88	60	54	68	56
2017	98	83	91	91	20	49	57	61	17	27	35	45	64	53	52	56	61	35	69	81	33	24	56	35
2017	81	90	97	97	43	55	76	70	27	46	42	48	67	77	88	75	77	50	81	81	46	35	59	49
2017	100	96	91	84	46	55	68	65	16	22	16	34	54	65	52	47	73	39	59	75	39	26	64	53
2016	89	100	94	94	65	66	52	70	35	57	45	50	66	82	62	72	92	56	69	84	54	40	77	49
2016	92	94	94	88	48	72	73	63	56	68	57	68	66	66	61	66	87	58	75	88	70	59	69	60
2016	100	97	91	97	65	79	73	61	57	48	59	56	78	85	62	66	87	55	81	88	51	36	53	46
2016	89	78	94	97	58	65	52	53	32	59	53	44	61	69	59	59	87	45	75	66	49	24	59	54
2017	85	90	97	91	59	45	63	70	12	39	36	38	65	76	71	84	80	35	72	69	41	27	54	36
2017	85	90	100	91	20	52	68	68	19	49	33	35	40	52	77	69	65	33	75	84	22	28	61	42
2016	90	90	94	94	60	70	65	55	50	65	66	70	79	73	61	56	80	52	72	78	54	38	59	57
2016	100	96	94	94	77	86	69	68	42	51	65	54	53	63	62	59	87	59	81	84	53	30	73	57
2017	82	85	88	94	36	40	61	66	24	21	45	73	63	41	45	41	76	46	88	81	40	36	57	51
2017	94	92	94	91	27	70	71	65	19	33	26	39	64	65	59	69	83	35	81	88	33	31	56	48
2017	88	78	97	97	36	45	73	70	14	44	34	41	73	66	74	69	68	42	72	91	47	35	46	49
2016	89	97	94	91	77	76	73	83	56	76	72	58	64	74	52	69	92	55	75	81	55	52	54	63
2017	73	61	78	88	14	35	61	63	20	19	50	65	43	49	59	72	68	33	72	81	34	25	56	58
2017	78	78	88	84	16	47	59	49	26	46	35	48	51	50	58	63	85	49	56	84	29	28	46	36
2017	79	86	100	97	24	29	62	79	23	36	34	55	40	46	39	69	62	35	63	94	34	34	66	46
2017	80	63	84	88	31	43	63	60	15	39	47	48	51	45	69	53	74	48	75	88	39	34	57	49
2017	88	96	97	97	44	79	67	69	23	36	59	60	63	79	62	59	80	55	91	84	39	33	64	49
2017	94	89	84	91	53	70	69	66	34	40	24	44	71	74	60	63	85	46	72	91	56	53	75	58
2017	77	84	81	94	33	54	62	74	13	25	49	35	54	60	47	50	71	47	69	94	33	23	57	39
2016	94	88	94	100	80	72	82	73	57	43	67	65	86	71	72	69	92	65	75	94	65	46	84	65
2016	90	85	94	88	63	76	74	68	35	52	44	56	70	84	64	66	95	55	84	78	59	34	63	58
2017	56	81	84	88	32	38	58	43	14	23	33	48	47	72	67	66	69	42	69	69	37	31	65	49
2016	97	81	91	91	67	67	82	75	64	77	80	69	70	44	68	56	87	46	78	84	62	60	66	56
2017	95	92	94	100	56	60	68	69	18	31	38	46	57	71	64	69	92	50	94	75	24	19	48	35
2016	97	94	94	97	66	80	64	80	75	74	81	64	74	91	74	81	88	63	69	94	55	60	66	60
2017	92	100	97	100	27	72	68	56	27	48	58	65	46	48	40	38	80	44	72	81	29	29	44	44
2016	97	90	88	97	50	78	69	61	39	59	57	49	87	84	76	66	95	54	63	72	62	54	70	57
2017	87	82	84	94	28	65	56	81	26	50	30	59	60	58	43	53	74	59	50	91	40	24	50	42
2017	77	74	94	91	35	60	74	59	21	36	46	44	63	69	66	66	71	40	78	97	39	31	56	49
2016	95	96	88	91	74	77	89	80	42	51	65	64	58	69	70	50	92	65	88	88	69	66	84	65
2016	97	98	84	97	48	63	60	65	47	66	57	59	76	65	44	63	92	53	66	91	66	51	68	66
2016	63	88	97	97	52	64	70	76	35	55	56	65	72	69	76	59	83	48	81	78	56	34	60	55
2017	68	83	81	88	22	38	69	49	24	46	41	58	69	71	75	63	61	35	75	81	44	34	65	48
2016	95	100	84	94	71	82	77	78	58	69	35	54	72	54	70	47	87	52	69	94	51	39	56	52
2016	100	100	91	94	64	72	84	69	49	52	54	76	84	74	68	69	92	49	81	84	57	45	72	56
2016	83	94	88	78	58	77	69	58	59	68	69	68	70	64	73	44	92	52	56	75	51	50	61	47
2017	89	85	97	100	25	57	55	73	31	5	48	44	44	59	39	63	55	26	59	88	27	30	47	53
2017	81	84	97	97	20	43	64	65	21	31	42	60	68	58	52	59	87	51	81	75	46	33	57	48
2017	89	94	81	88	34	71	77	68	29	28	29	23	63	67	55	63	85	56	81	78	43	34	57	45
2016	92	92	91	94	71	90	73	76	47	58	60	81	80	83	73	66	83	58	59	88	61	53	71	62
2017	85	81	88	97	36	63	71	58	14	23	49	39	69	76	79	66	76	54	81	88	41	36	62	45
2016	100	85	84	91	51	69	73	68	51	56	61	53	64	77	88	75	87	58	72	91	61	40	64	51
2017	97	75	94	94	41	54	69	71	23	37	53	41	82	72	68	56	69	49	75	88	44	43	52	44
2017	89	85	91	91	45	63	77	70	24	54	48	51	33	62	72	53	75	51	63	81	35	38	64	39
2017	68	81	97	91	20	42	73	70	23	38	51	50	50	64	63	75	64	52	75	88	36	30	61	41
2016	96	86	94	94	66	75	72	73	29	46	58	43	70	74	71	72	85	65	69	81	47	46	59	53
2017	98	79	81	91	41	65	71	66	25	43	54	65	71	81	72	69	76	42	69	78	41	31	56	48
2017	96	96	88	84	21	60	67	70	26	51	42	41	57	60	60	47	64	69	66	78	33	30	54	40
2017	97	82	91	84	34	70	67	65	10	37	27	50	29	53	78	66	73	47	72	91	31	24	57	47
2017	84	97	94	94	31	55	78	65	25	39	59	66	65	78	78	69	54	52	84	81	45	30	51	54
2017	97	85	88	97	24	49	74	79	12	30	34	51	57	53	63	56	46	33	59	91	51	33	67	44
2016	94	97	97	91	76	79	83	85	58	59	48	51	81	66	76	72	92	49	78	91	66	56	72	64
2016	97	97	97	100	48	75	71	70	57	71	65	68	63	71	75	66	87	52	75	75	58	62	86	59
2016	84	90	100	88	68	73	89	73	60	49	62	51	74	70	67	63	92	48	88	88	77	45	66	66
2017	90	92	94	88	44	63	83	70	24	46	68	69	56	74	50	72	73	58	88	78	38	35	64	47
2017	77	78	97	88	20	54	71	64	19	34	62	64	53	56	71	59	70	52	75	94	36	30	61	46
2017	83	91	97	94	33	61	83	68	28	57	45	56	65	64	82	69	80	49	78	84	45	34	64	48
2016	83	85	91	91	72	77	79	75	58	48	57	63	77	64	63	69	92	56	69	84	54	44	71	59
2016	97	85	91	88	54	77	64	74	48	51	45	68	66	64	60	66	88	49	75	88	57	39	73	61
2016	72	93	94	88	73	79	70	75	50	60	44	63	77	68	62	66	88	50	88	84	42	39	61	40
2016	91	79	91	97	65	77	81	73	51	64	55	54	69	60	62	59	87	55	78	84	54	49	69	57
2016	100	97	91	97	68	80	80	74	42	71	66	73	70	67	64	56	90	52	81	94	61	61	76	61
2017	99	92	88	100	53	63	81	81	36	43	48	54	69	75	58	81	85	63	88	84	45	37	63	69
2016	80	91	88	91	67	72	71	55	60	72	68	65	71	74	72	63	87	55	81	84	59	50	67	51
2017	86	84	81	88	16	51	59	69	14	44	52	51	36	45	56	66	48	45	69	81	33	18	53	38
2016	100	84	88	94	72	68	71	75	67	66	73	75	87	65	71	69	92	52	72	91	56	35	66	56
2016	88	89	91	94	64	77	70	79	60	52	47	60	75	64	62	59	87	58	75	88	60	52	72	64
2017	85	88	97	94	43	46	70	73	22	34	37	58	54	59	83	84	75	39	88	97	34	27	61	46
2017	88	84	91	88	17	61	63	70	22	48	48	63	70	75	66	72	83	55	66	88	53	42	67	48
2017	88	89	94	88	13	64	74	63	16	41	29	43	41	40	61	47	69	49	66	88	21	33	60	39
2017	79	88	94	91	22	45	62	76	24	21	19	53	48	41	51	56	65	46	78	84	37	26	53	44
2016	92	98	100	94	57	71	66	65	52	51	68	53	83	69	76	66	85	46	63	78	59	52	76	58
2017	71	85	94	94	22	55	71	65	19	31	51	55	59	63	77	81	80	42	84	91	20	28	51	48
2016	88	85	94	91	70	74	73	68	55	63	56	59	74	68	57	63	80	58	81	94	56	50	71	56
2017	77	90	88	81	49	60	74	51	33	46	43	54	60	74	77	56	65	42	66	88	39	24	57	42
2017	100	84	97	100	39	68	57	60	26	49	18	36	42	77	58	50	58	53	78	75	26	23	46	30
2017	98	92	94	91	44	74	76	63	37	72	61	81	76	74	68	84	92	46	81	81	60	36	67	63
2017	61	72	69	88	14	48	58	51	21	34	41	43	54	66	52	59	62	29	69	78	24	24	56	43
2016	83	89	91	91	52	75	69	65	59	67	48	69	79	74	69	72	80	55	72	91	53	45	74	59
2017	77	90	88	94	37	67	69	73	25	42	44	38	58	78	64	59	76	43	56	84	47	37	64	51
2017	93	96	94	88	35	63	81	61	15	35	39	60	50	38	50	66	54	39	91	75	40	28	61	44

## Sheet: Data Description
The data includes each students' matriculation year (2016 or 2017) and the percentage of possible points in six skill areas on four examinations.
	Data Format
	Column Name	Data Description
	MatricYear	Matriculation Year
	IntSkFS17i	Interactional Skills Fall Semester Exam 1
	IntSkFS17ii	Interactional Skills Fall Semester Exam 2
	IntSkSS18i	Interactional Skills Spring Semester Exam 1
	IntSkSS18ii	Interactional Skills Spring Semester Exam 2
	HistoryFS17i	History Fall Semester Exam 1
	HistoryFS17ii	History Fall Semester Exam 2
	HistorySS18i	History Spring Semester Exam 1
	HistorySS18ii	History Spring Semester Exam 2
	PhysExFS17i	Physical Exam Fall Semester Exam 1
	PhysExFS17ii	Physical Exam Fall Semester Exam 2
	PhysExSS18i	Physical Exam Spring Semester Exam 1
	PhysExSS18ii	Physical Exam Spring Semester Exam 2
	CounselFS17i	Counseling Fall Semester Exam 1
	CounselFS17ii	Counseling Fall Semester Exam 2
	CounselSS18i	Counseling Spring Semester Exam 1
	CounselSS18ii	Counseling Spring Semester Exam 2
	SafetyFS17i	Safety Fall Semester Exam 1
	SafetyFS17ii	Safety Fall Semester Exam 2
	SafetySS18i	Safety Spring Semester Exam 1
	SafetySS18ii	Safety Spring Semester Exam 2
	PostFS17i	Postencounter Fall Semester Exam 1
	PostFS17ii	Postencounter Fall Semester Exam 2
	PostSS18i	Postencounter Spring Semester Exam 1
	PostSS18ii	Postencounter Spring Semester Exam 2
